# Supplementary material for: Electrochemical impedance and X-ray absorption spectroscopy analyses of degradation in dye-sensitized solar cells containing cobalt tris(bipyridine) redox shuttles
Source: Royal Society of Chemistry journal article supplement (doi:10.1039/d2cp02283d), 2022-01-01
Supplement: d2cp02283d1.pdf [file d2cp02283d1.pdf]

**Fig. S1** The  $J$ - $V$  characteristics of fresh DSSCs containing different electrolytes (A1~A4) varying in cobalt redox complex concentrations.

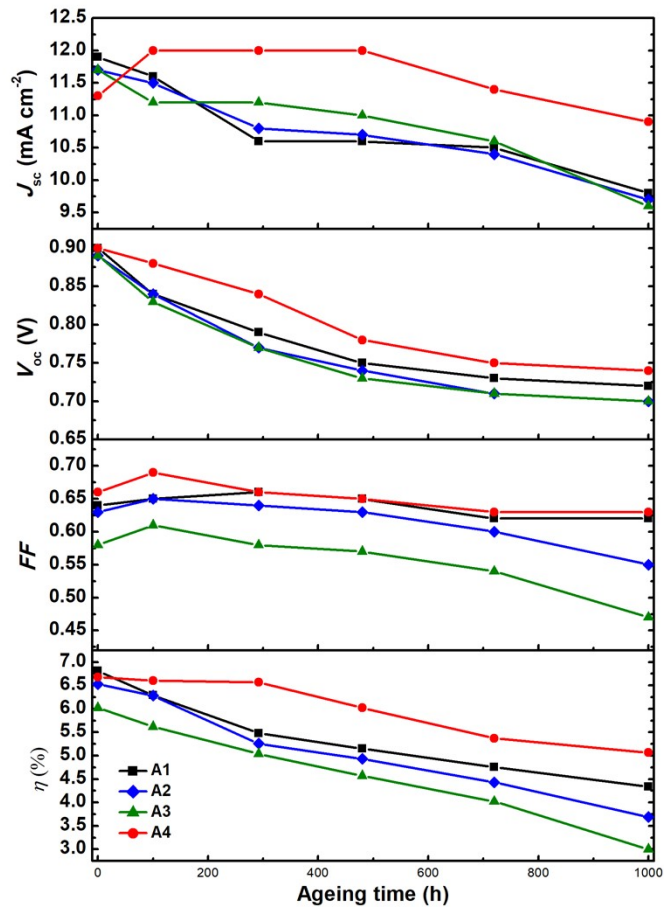

**Fig. S2** The photovoltaic parameters for DSSCs containing different electrolytes (A1~A4) varying in cobalt redox complex concentrations and their evolutions with ageing time.

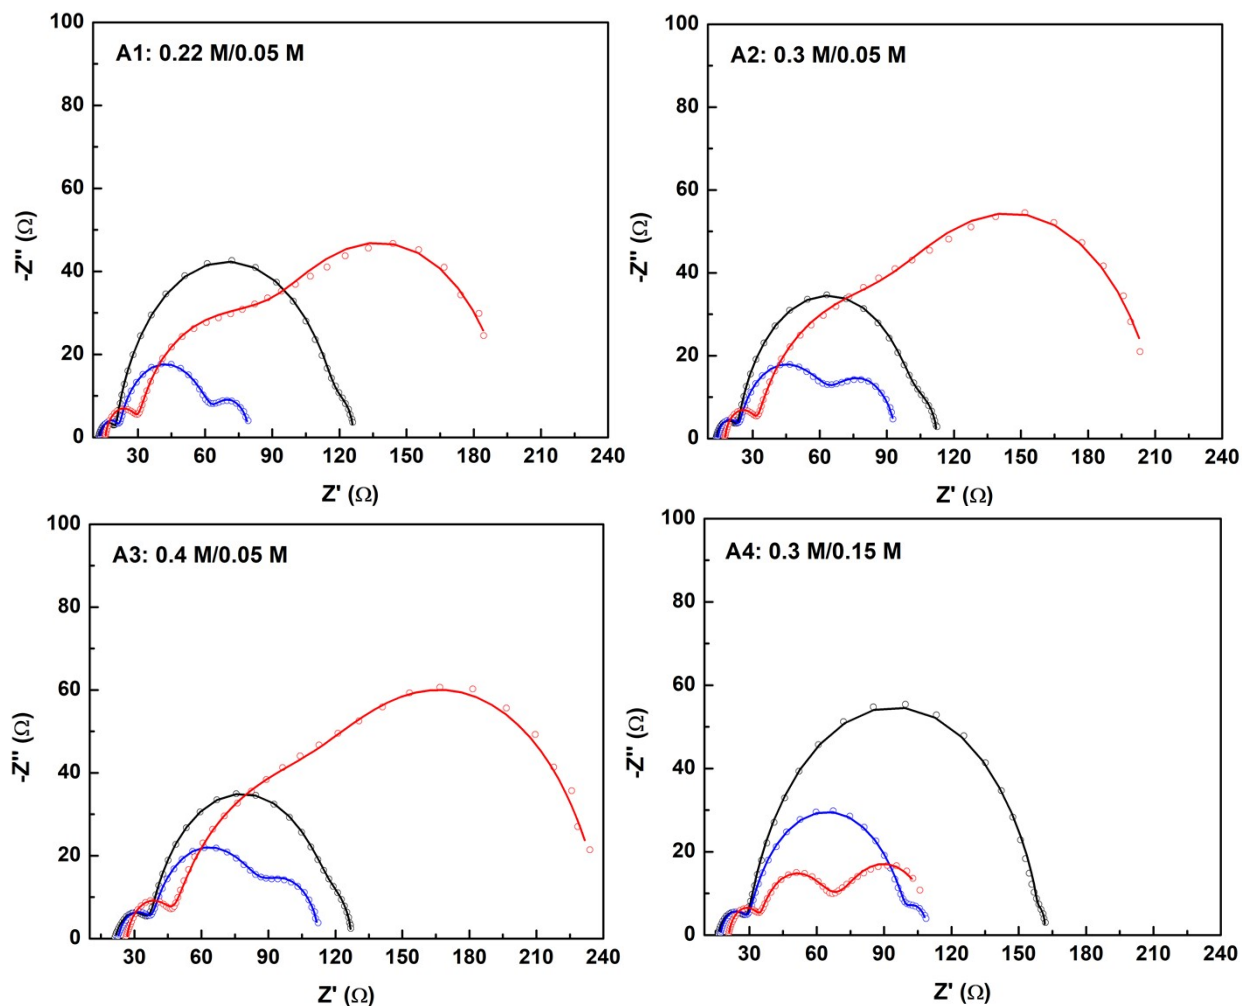

**Fig. S3** The Nyquist plots of DSSCs containing different electrolytes (A1~A4) varying in cobalt redox complex concentrations after fabrication (black) and ageing for 300 h (blue), 1000 h (red); the data points were fitted by Z-View according to the equivalent circuit (Model 1).

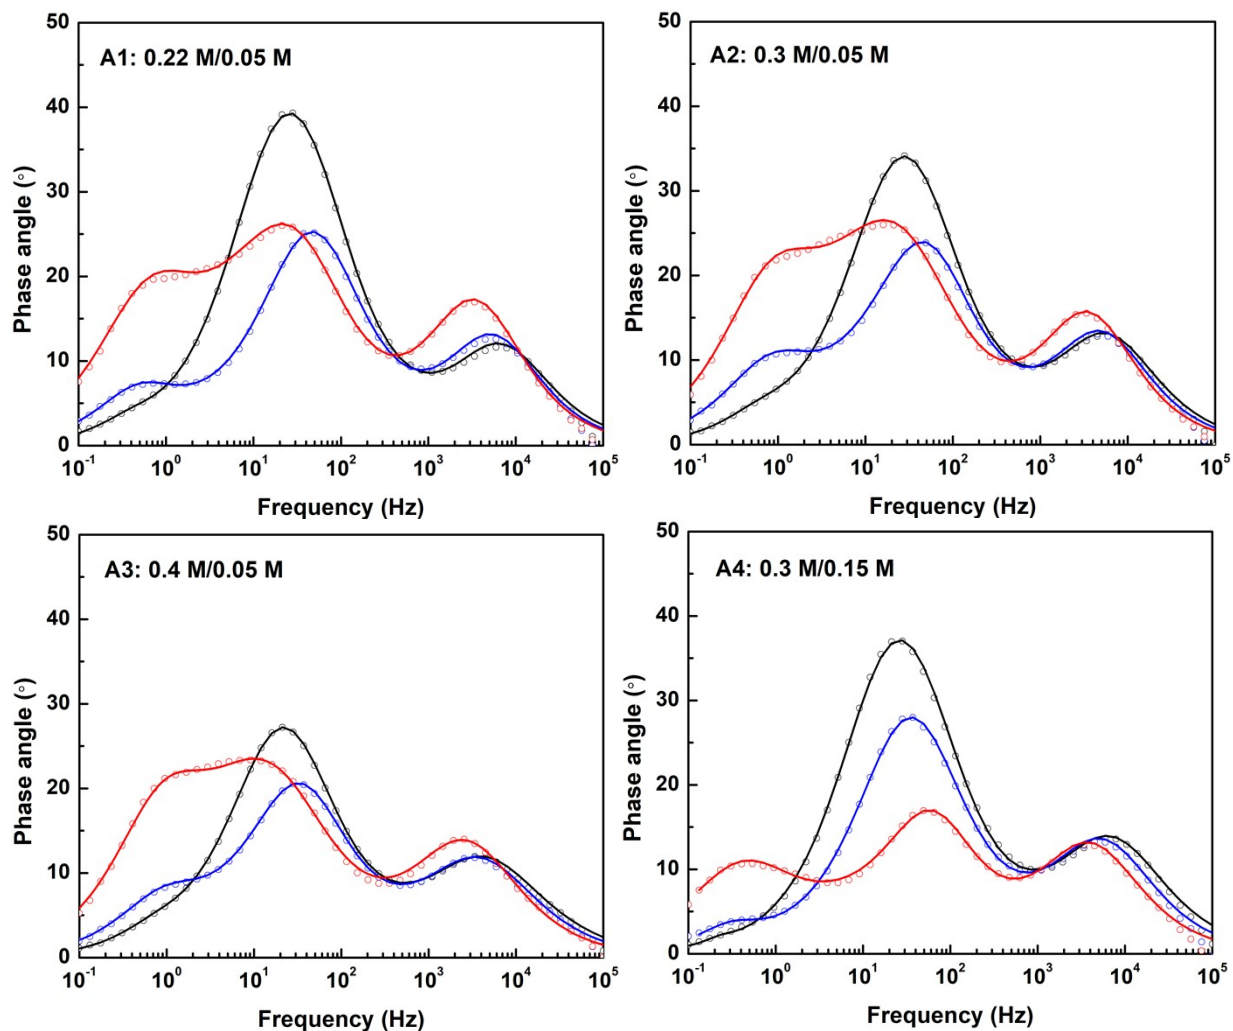

**Fig. S4** Bode plots for DSSCs containing different electrolytes varying in cobalt redox complex concentrations (A1~A4) tested after fabrication (black) and ageing for 300h (blue), 1000 h (red); the data points were fitted by Z-View according to the equivalent circuit (Model 1).

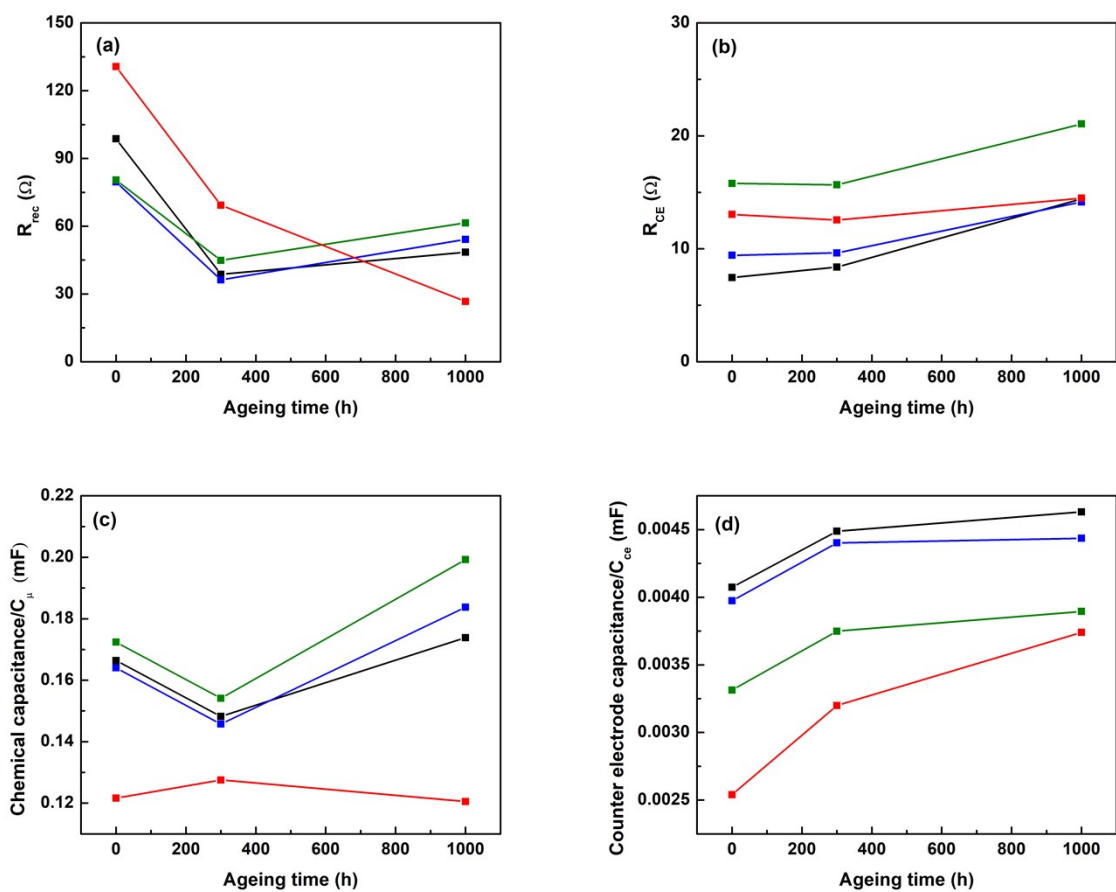

**Fig. S5** The evolution of (a)  $R_{rec}$ , (b)  $R_{ct}$ , (c)  $C_{\mu}$  and (d)  $C_{ce}$  with the ageing time for DSSCs varying in the electrolytes: A1, black; A2, blue; A3, green and A4, red. The data were extracted from EIS results.

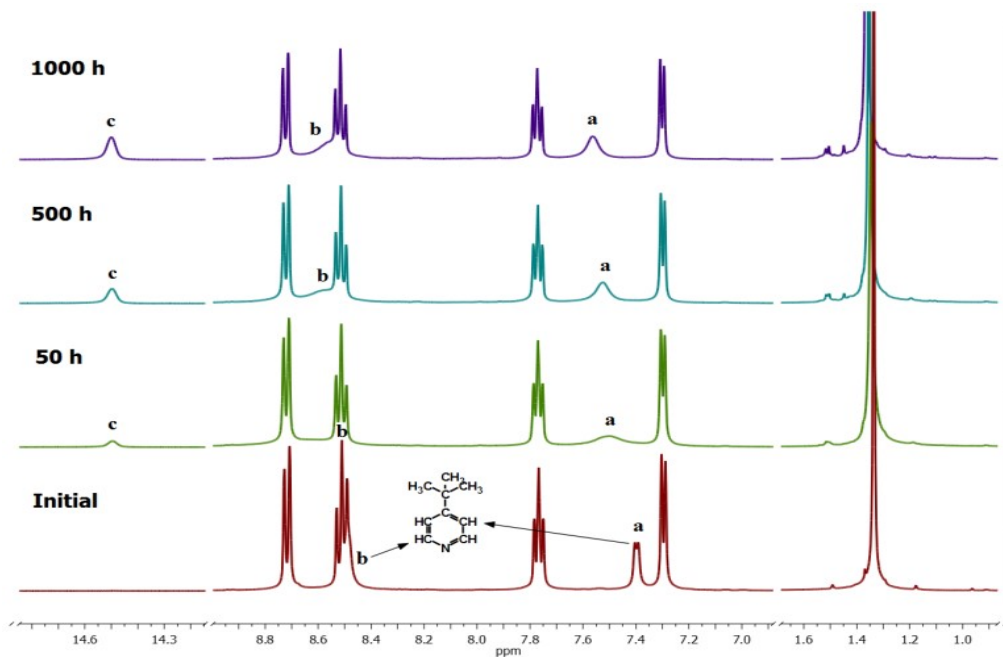

**Fig. S6**  $^1\text{H-NMR}$  spectra of the 0.05 M/0.06 M  $\text{Co}(\text{bpy})_3^{3+}$ /TBP mixture in deuterated acetonitrile recorded during the ageing test. Characteristic peaks of the TBP-pyridine hydrogen atoms are labelled *a* and *b*. The new peak appearing is labelled *c*.

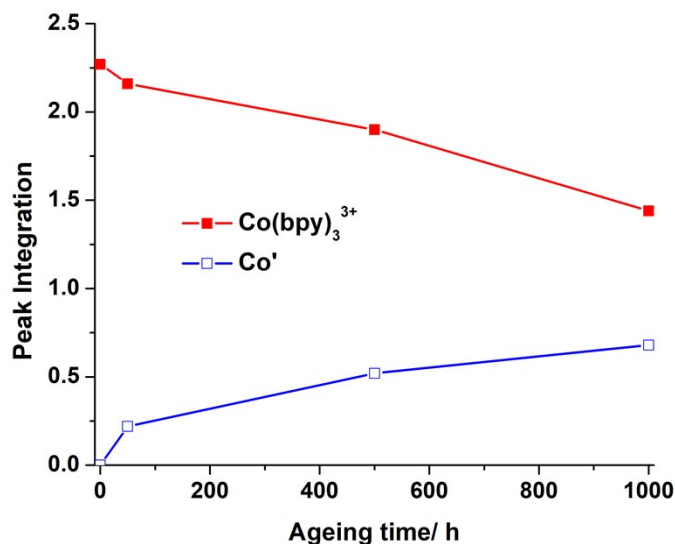

**Fig. S7** Integration of characteristic H-peak of  $\text{Co}(\text{bpy})_3^{3+}$  (7.75-7.78 ppm) and new cobalt complex ( $\text{Co}'$ , 14.5 ppm) as function of the ageing time. The peak of acetonitrile at 1.97 ppm was used as the reference.

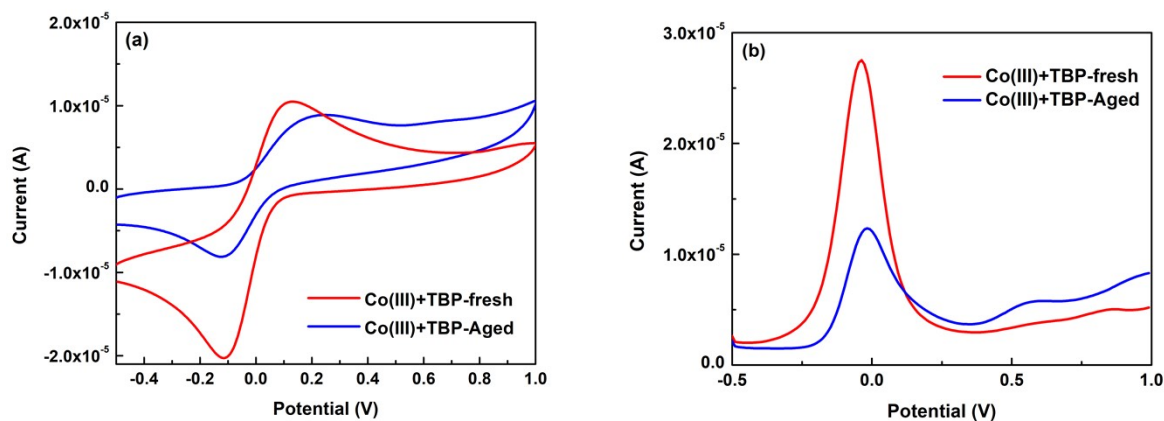

**Fig. S8.** (a) CV and (b) DPV curves measured in the fresh (red) and aged (blue) 3.5 mM/7 mM  $\text{Co}(\text{bpy})_3^{3+}$  /TBP acetonitrile electrolyte under light/ $60^\circ\text{C}$  exposure for 200 h with a scan rate of 50 mV/s.

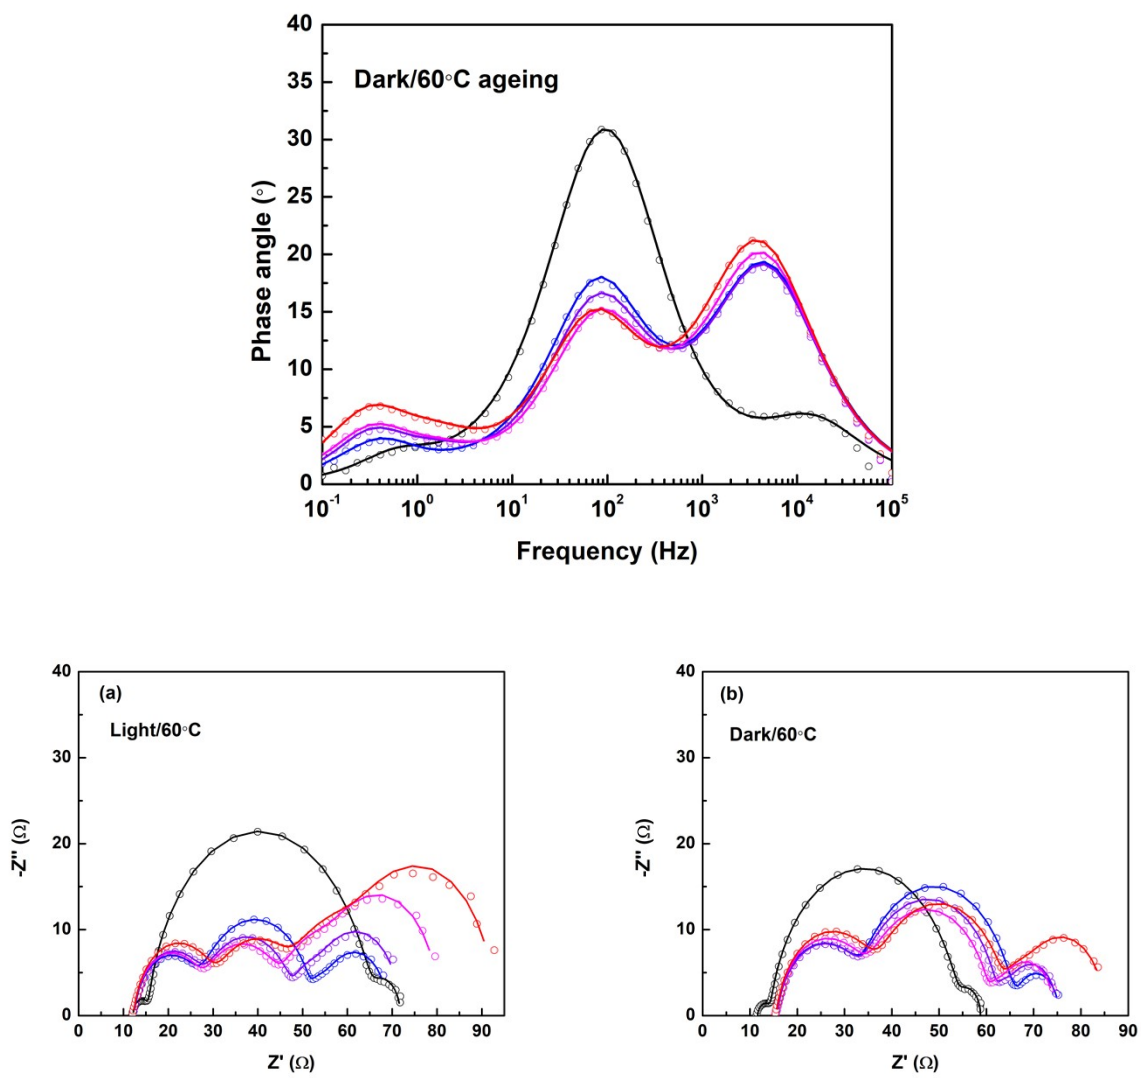

**Fig. S9** Bode phase angle plots (above) and Nyquist plots (below) of DSSCs containing 0.1 M EIm<sup>+</sup> aged under (a) light/60°C and (b) dark/60°C for 0 h, black; 274h, blue; 514h, purple; 730h, pink and 1000h, red. The data points were fitted by Z-View.

**Table S1** The composition of the electrolyte and the photovoltaic characteristics of the corresponding DSSCs recorded under full sun irradiation (AM 1.5G, ~100 mW/cm<sup>2</sup>).

| Electrolyte <sup>a</sup>      | Cation,<br>ionic<br>radii/nm               | [C <sup>+</sup> ]<br>/M | $J_{sc}$<br>/mA<br>cm <sup>-2</sup> | $V_{oc}$<br>/V | $FF$ | $\eta$<br>/% | $R_{dif}$<br>/Ω |
|-------------------------------|--------------------------------------------|-------------------------|-------------------------------------|----------------|------|--------------|-----------------|
| <b>A-Free</b>                 | None                                       | 0                       | 10.5                                | 0.92           | 0.65 | 6.25         | 8.0             |
| <b>A-TEA</b>                  | TEA <sup>+</sup> ,<br>0.34 <sup>[S1]</sup> | 0.1                     | 10.7                                | 0.93           | 0.66 | 6.57         | 9.7             |
| <b>A-TBA</b>                  | TBA <sup>+</sup> ,<br>0.41 <sup>[S1]</sup> | 0.1                     | 10.3                                | 0.92           | 0.65 | 6.16         | 9.0             |
| <b>A-BIm</b>                  | BIm <sup>+</sup> ,<br>0.33 <sup>[S2]</sup> | 0.1                     | 10.6                                | 0.93           | 0.65 | 6.41         | 9.6             |
| <b>[A-EIm]<sub>low</sub></b>  |                                            | 0.1                     | 10.5                                | 0.93           | 0.68 | 6.60         | 9.0             |
| <b>[A-EIm]<sub>medi</sub></b> | EIm <sup>+</sup> ,<br>0.30 <sup>[S3]</sup> | 0.8                     | 10.8                                | 0.93           | 0.67 | 6.70         | 13.0            |
| <b>[A-EIm]<sub>high</sub></b> |                                            | 1.5                     | 10.0                                | 0.94           | 0.66 | 6.24         | 28.5            |

<sup>a</sup>All electrolytes contained 0.3 M/0.15 M Co(bpy)<sub>3</sub><sup>2+/3+</sup> and 0.2 M TBP in acetonitrile solvent.



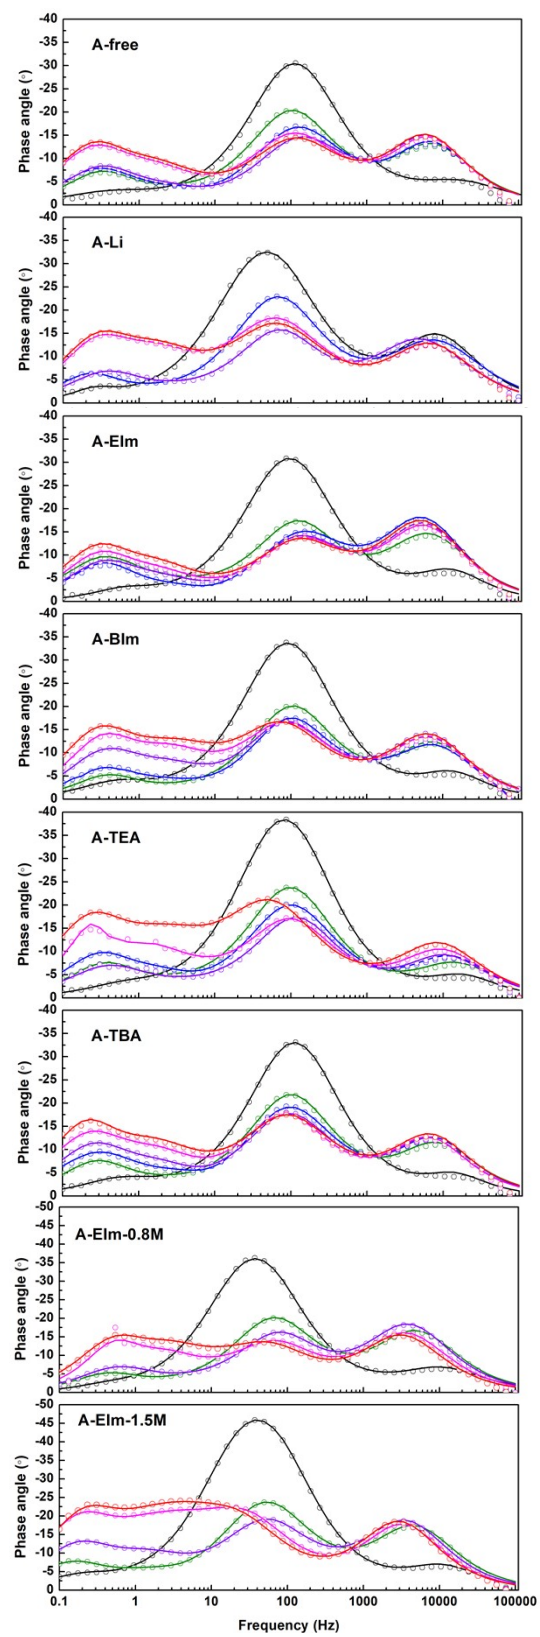

**Fig. S10** Bode phase-angle plots for DSSCs containing no cation co-additives (A-Free), different cation co-additives of 0.1 M as labelled and  $\text{EIm}^+$  of other two concentrations (0.8 M and 1.5 M). The plots were recorded during the ageing tests: Initial, black; 196h, green; 336h, blue; 576h, purple; 720h, pink; 1000h, red.

**Table S2** Modelling data extracted from EIS results of DSSCs containing 1.5 M  $\text{EIm}^+$  aged for 720 h.

| Models  | $R_s/\Omega$ | $R_{ct}/\Omega$ | $Q_{ct}$ | $n_{ct}$ | $R_{rec}/\Omega$ | $Q_{\mu}$ | $n_{\mu}$ | $W_s/\Omega$ | $W_s-T$ | $W_s-P$ | $R_{new}/\Omega$ | $Q_{new}$ | $n_{new}$ |
|---------|--------------|-----------------|----------|----------|------------------|-----------|-----------|--------------|---------|---------|------------------|-----------|-----------|
| Model 1 | 20.5         | 18.2            | 5.50E-06 | 0.96     | 68.0             | 4.30E-04  | 0.81      | 181.0        | 3.01    | 0.46    | -                | -         | -         |
| Model 2 | 20.5         | 18.8            | 6.03E-06 | 0.95     | 32.6             | 4.44E-04  | 0.88      | 135.4        | 2.35    | 0.51    | 82.28            | 1.51E-03  | 0.81      |

**Table S3** Modelling parameters for the new EIS feature of DSSCs containing 0.1M  $\text{EIm}^+$  varying in the ageing conditions and ageing time as listed.

| Ageing conditions | Ageing time | $R_{rec}/\Omega$ | $Q_{\mu}$ | $n_{\mu}$ | $R_{new}/\Omega$ | $Q_{new}$ | $n_{new}$ |
|-------------------|-------------|------------------|-----------|-----------|------------------|-----------|-----------|
| Light/60°C        | 274h        | 25.96            | 0.000203  | 0.88159   | 1.395            | 0.005326  | 1.352     |
|                   | 514h        | 20.30            | 0.000217  | 0.88455   | 6.309            | 0.006881  | 1.087     |
|                   | 730h        | 17.81            | 0.000265  | 0.87838   | 14.55            | 0.005206  | 0.9698    |
|                   | 1000h       | 17.28            | 0.000291  | 0.89202   | 16.42            | 0.003060  | 0.9715    |
| Dark/60°C         | 514h        | 29.01            | 0.000144  | 0.92918   | 2.927            | 0.011353  | 1.224     |
|                   | 730h        | 25.94            | 0.000154  | 0.93124   | 3.079            | 0.010125  | 1.204     |
|                   | 1000h       | 26.81            | 0.000164  | 0.93496   | 6.241            | 0.008413  | 1.094     |

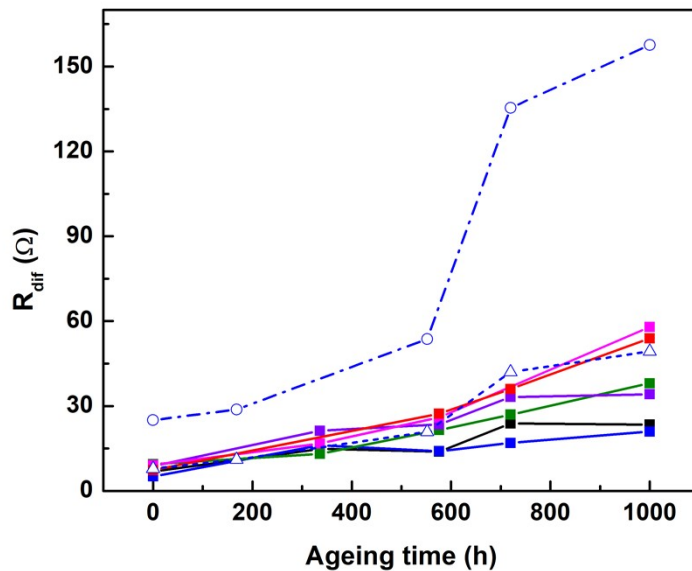

**Fig. S11** The evolutions of  $R_{new}$  with the ageing time for DSSCs containing no (A-free, black) and various cation co-additives of 0.1 M: A- $\text{EIm}^+$ , blue solid lines; A- $\text{BIm}^+$ , green; A- $\text{TBA}^+$ , purple; A- $\text{TEA}^+$ , pink; A- $\text{Li}^+$ , red, and containing  $\text{EIm}^+$  of higher concentrations: 0.8 M, blue, triangle, dash line; 1.5 M, blue, circle, dash dot line. The values were extracted from the corresponding EIS results.

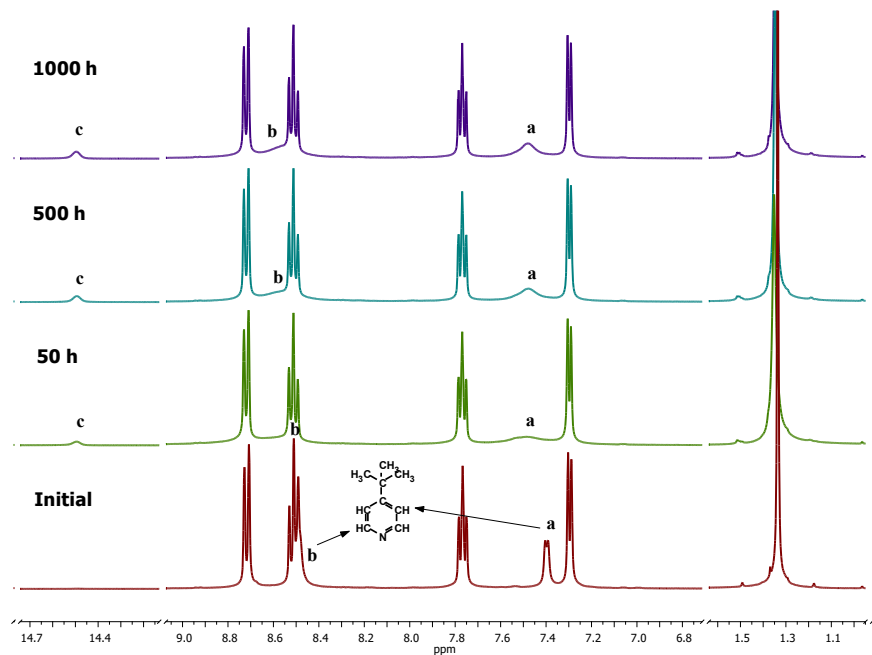

**Fig. S12.** <sup>1</sup>H NMR spectra of 0.05 M/0.06 M Co(bpy)<sub>3</sub><sup>3+</sup>/TBP in d<sup>3</sup>-acetonitrile recorded during the stability tests under exposure to darkness/60°C conditions. Characteristic peaks of TBP pyridine hydrogen are labelled a and b. The new peak is labelled c.

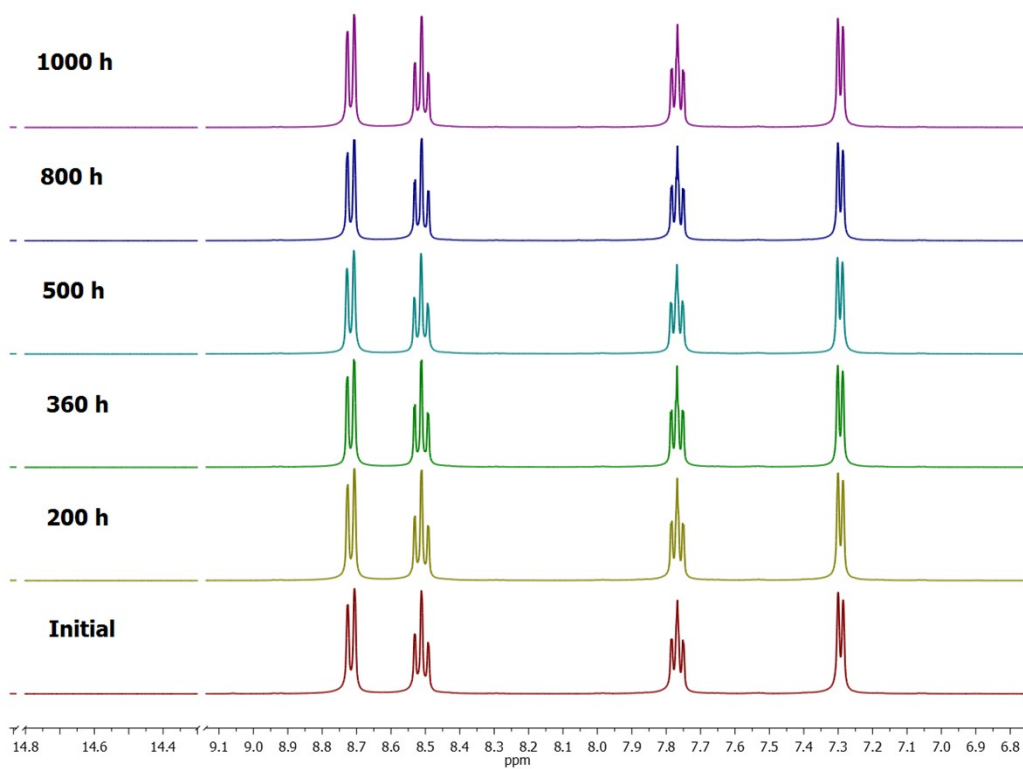

**Fig. S13** <sup>1</sup>H NMR spectra of Co(bpy)<sub>3</sub><sup>3+</sup> in d<sup>3</sup>-acetonitrile monitored during the ageing test.

## References

- S1. Kubota, S.; Ozaki, S.; Onishi, J.; Kano, K.; Shirai, O. Selectivity on Ion Transport across Bilayer Lipid Membranes in the Presence of Gramicidin A. *Anal. Sci.*, 2009, 25, 189-193.
- S2. Wang, H.; Wang, J.; Zhang, S.; Pei, Y.; Zhuo, K. Ionic Association of the Ionic Liquids [C4mim][BF4], [C4mim][PF6], and [Cn mim]Br in Molecular Solvents. *ChemPhysChem*, 2009, 10, 2516-2523.
- S3. McEwen, A. B.; Ngo, H. L.; LeCompte, K.; Goldman, J. L. Electrochemical Properties of Imidazolium Salt Electrolytes for Electrochemical Capacitor Applications. *J. Electrochem. Soc.*, 1999, 146, 1687-1695.
